# Supplementary material for: Assembly of electric double-layer capacitors with hardwood kraft lignin-based electrodes and separator together with ionic liquid electrolyte
Source: publisher site journal article supplement (doi:10.1515/hf-2022-0143), 2022-12-14
Supplement: Supplementary file 1 [file j_hf-2022-0143_suppl.pdf]

# Assembly of electric double-layer capacitors with hardwood kraft lignin-based electrodes and separator together with ionic liquid electrolyte

Nutthira Pakkang<sup>a</sup>, Shiori Suzuki<sup>b</sup>, Kengo Shigetomi<sup>b</sup>, Yasumitsu Uraki<sup>b\*</sup>

<sup>a</sup> Graduate School of Agriculture, Hokkaido University, Sapporo 060-8589, Japan

<sup>b</sup> Research Faculty of Agriculture, Hokkaido University, Sapporo 060-8589, Japan

\*Corresponding author: Yasumitsu Uraki; E-mail address: [uraki@for.agr.hokudai.ac.jp](mailto:uraki@for.agr.hokudai.ac.jp)

|                  | Table of Contents                                                                                                                                                                                                                                                                                                                                                                                                                                                              | Page # |
|------------------|--------------------------------------------------------------------------------------------------------------------------------------------------------------------------------------------------------------------------------------------------------------------------------------------------------------------------------------------------------------------------------------------------------------------------------------------------------------------------------|--------|
| <b>Figure S1</b> | A picture of spraying a 1 wt.% conductive carbon black (CB) suspension in acetone over an electrospun fiber mat during the electrospinning of the HKL-containing dope. The CB suspension was simply prepared by mixing a predetermined amount of CB powder and acetone with stirring at RT.                                                                                                                                                                                    | S2     |
| <b>Figure S2</b> | 2D and 3D surface images of the HKL-based electrodes: (a, b) E-S-CB-mat, (c, d) E-MS-CB-mat, and (e, f) E-S-CB-powder at a magnification $\times 2000$ .                                                                                                                                                                                                                                                                                                                       | S3     |
|                  | How to calculate surface roughness ( $S_a$ )                                                                                                                                                                                                                                                                                                                                                                                                                                   | S4     |
| <b>Figure S3</b> | Average cyclic voltammograms (CVs) of HKL-based EDLCs and a reference EDLC at scan rate of $0.05 \text{ V s}^{-1}$ .                                                                                                                                                                                                                                                                                                                                                           | S5     |
| <b>Figure S4</b> | Nyquist plots of HKL-based EDLCs and a reference EDLC.                                                                                                                                                                                                                                                                                                                                                                                                                         | S6     |
| <b>Figure S5</b> | 2D surface images of ACF mats and schematic illustrations of (a) a single thermostabilized fiber of tHKL separator and single carbon fibers of (b) S-CB-mat and (c) MS-CB-mat. These carbon fibers were activated by steam to develop micro- and mesopores in the fibers. CB aggregates are located both on the surface and inside of the S-CB-mat, while the aggregates positions only inside the MS-CB-mat in which CB fine powders would be dispersed in each single fiber. | S7     |
| <b>Figure S6</b> | Cyclic stability of HKL-based EDLCs and a reference EDLC as shown by capacitance retention from GCD at current density of $1 \text{ A g}^{-1}$ .                                                                                                                                                                                                                                                                                                                               | S8     |
| <b>Figure S7</b> | Comparison of energy and power densities of lignin-based EDLCs.                                                                                                                                                                                                                                                                                                                                                                                                                | S9     |
|                  | References in Figure S7                                                                                                                                                                                                                                                                                                                                                                                                                                                        | S10-11 |

This file contains 11 pages including 7 figures.

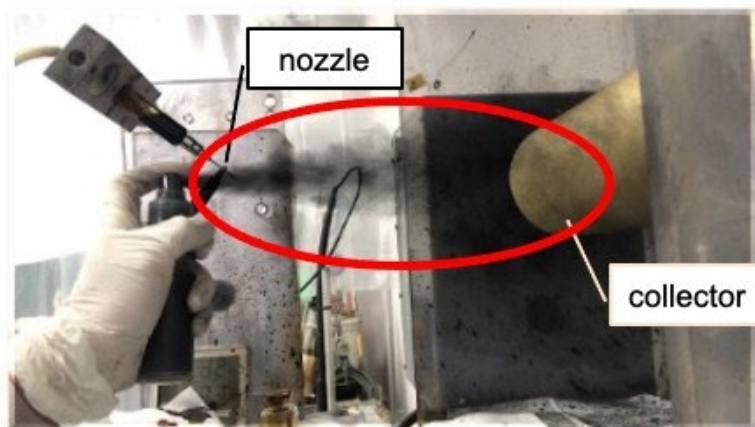

**Supplementary Figure S1:** A picture of spraying a 1 wt.% conductive carbon black (CB) suspension in acetone over an electrospun fiber mat during the electrospinning of the HKL-containing dope. The CB suspension was simply prepared by mixing a predetermined amount of CB powder and acetone with stirring at RT.

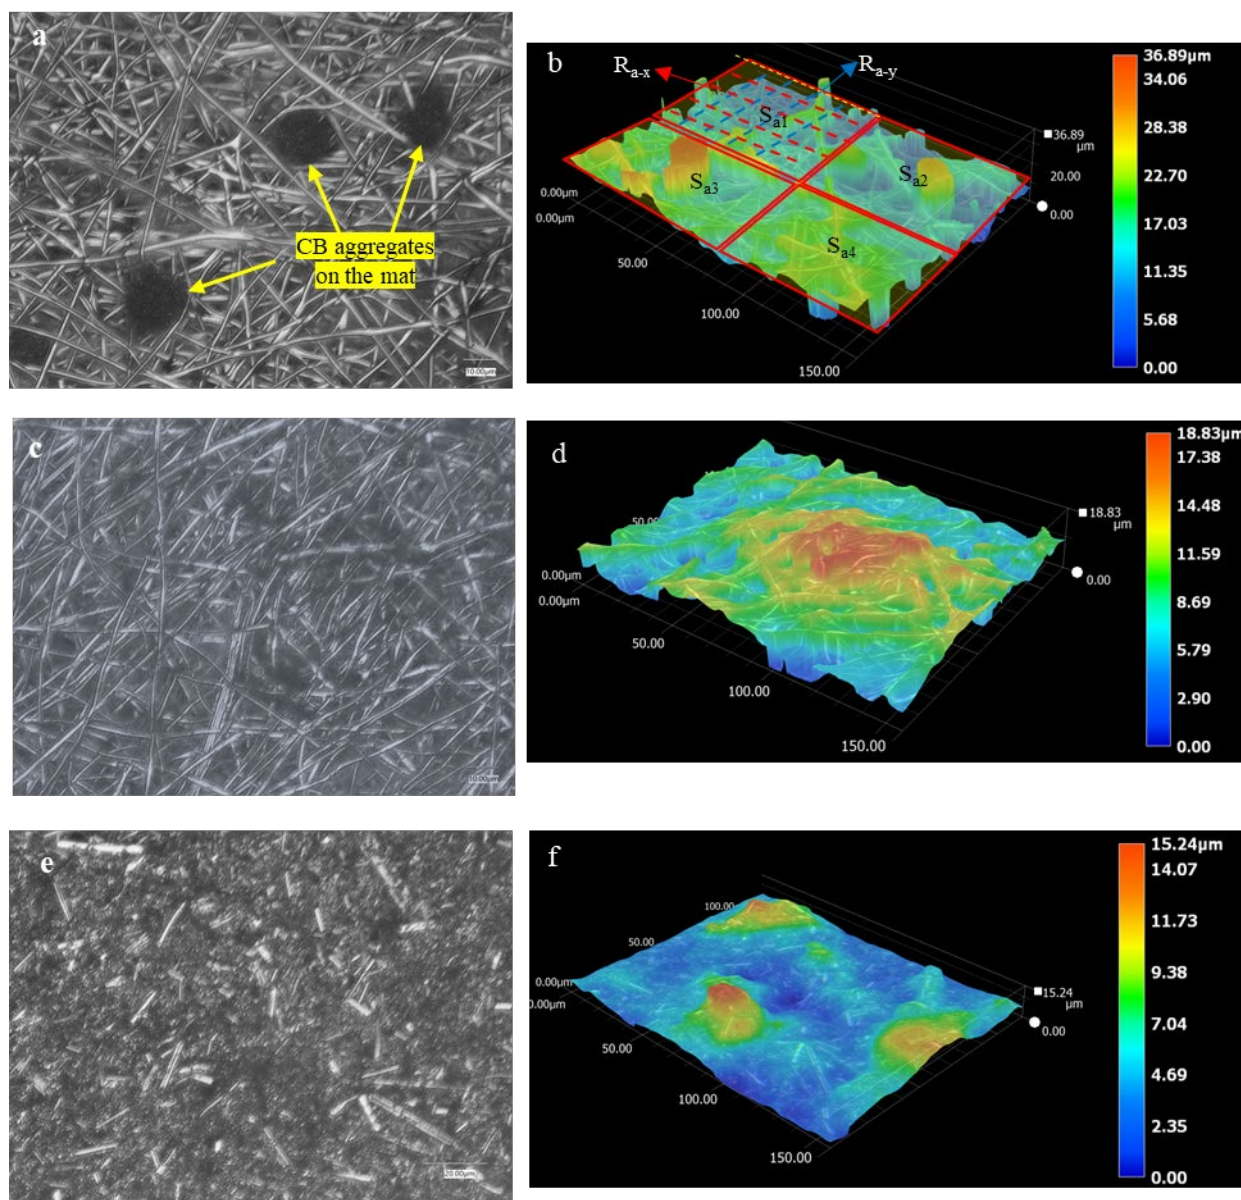

**Supplementary Figure S2:** 2D and 3D surface images of the HKL-based electrodes: (a, b) E-S-CB-mat, (c, d) E-MS-CB-mat, and (e, f) E-S-CB-powder at a magnification  $\times 2000$ .

## How to calculate surface roughness (Sa)

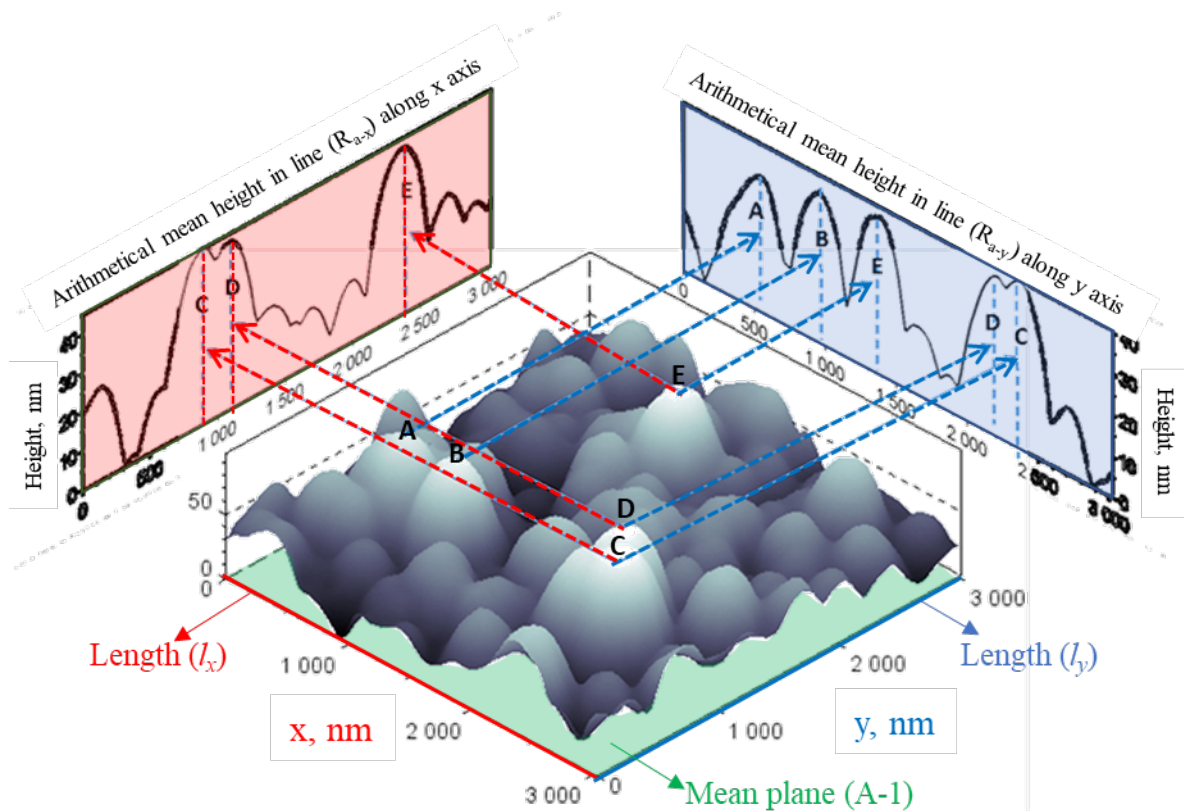

### Arithmetical mean height in line ( $R_a$ )

along x axis:  $R_{a-x} = \frac{1}{l_x} \int_0^{l_x} |z(x)| dx$

along y axis:  $R_{a-y} = \frac{1}{l_y} \int_0^{l_y} |z(y)| dy$

### Arithmetical mean height of the surface ( $S_a$ )

Mean plane:  $S_{a1} = \frac{1}{A_1 A_1} \iint |z(x, y)| dx dy$

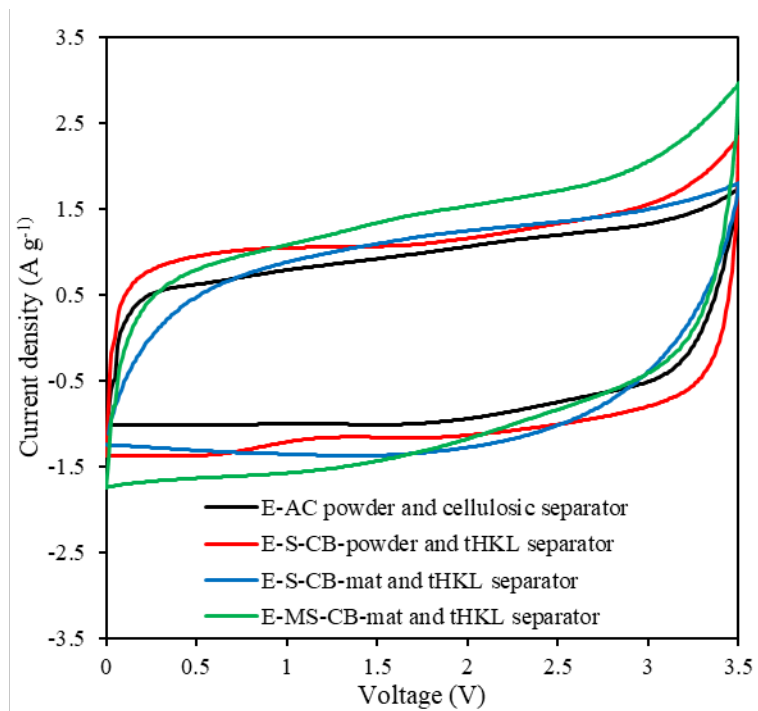

**Supplementary Figure S3:** Average cyclic voltammograms (CVs) of HKL-based EDLCs and a reference EDLC at scan rate of  $0.05 \text{ V s}^{-1}$ .

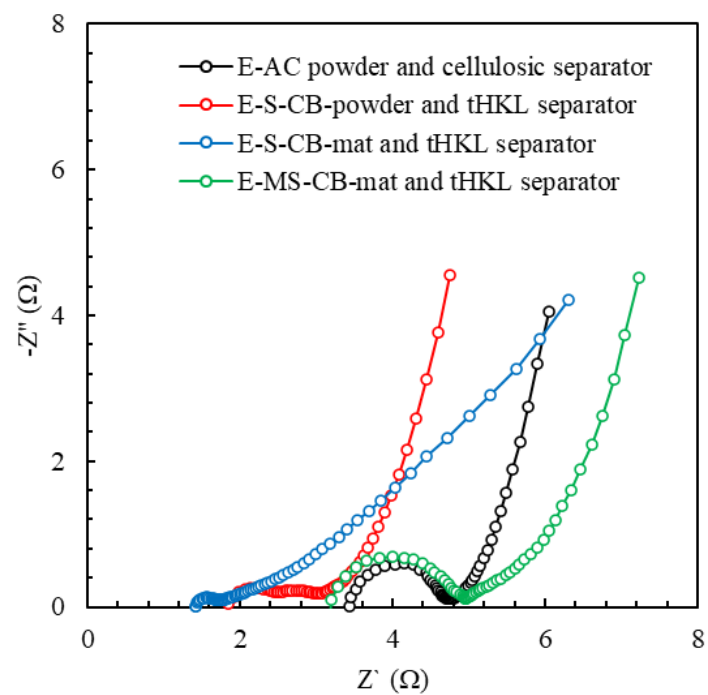

**Supplementary Figure S4:** Nyquist plots of HKL-based EDLCs and a reference EDLC.



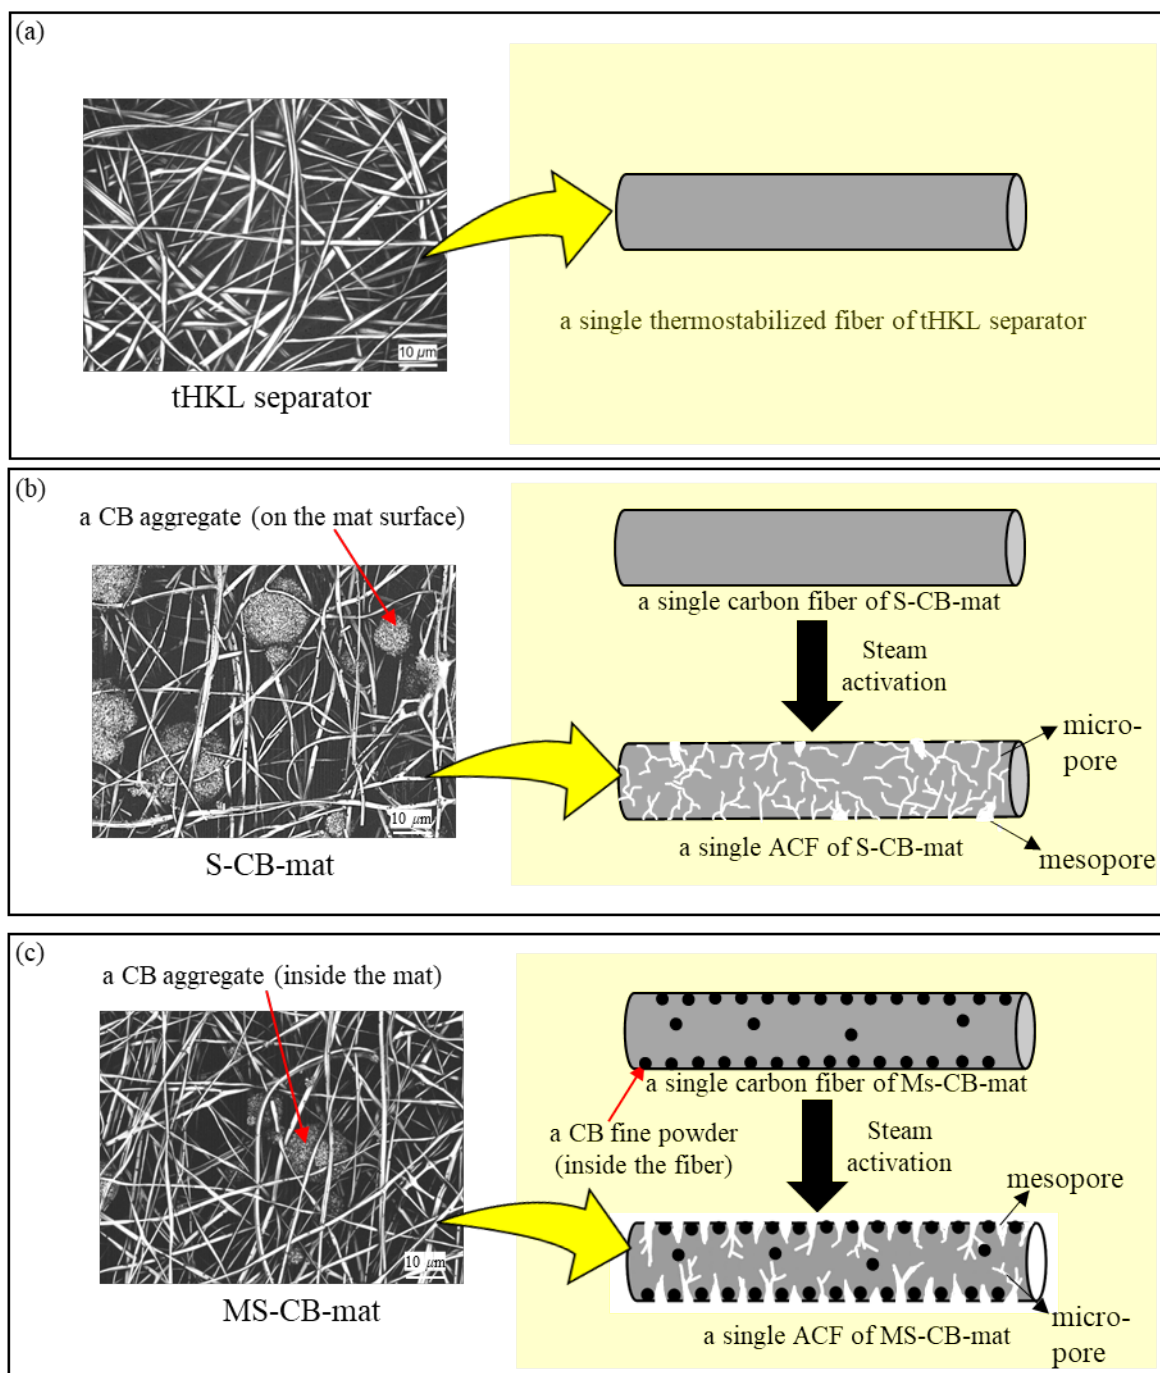

**Supplementary Figure S5:** 2D surface images of ACF mats and schematic illustrations of (a) a single thermostabilized fiber of tHKL separator and single carbon fibers of (b) S-CB-mat and (c) MS-CB-mat. These carbon fibers were activated by steam to develop micro- and mesopores in the fibers. CB aggregates are located both on the surface and inside of the S-CB-mat, while the aggregates positions only inside the MS-CB-mat in which CB fine powders would be dispersed in each single fiber.

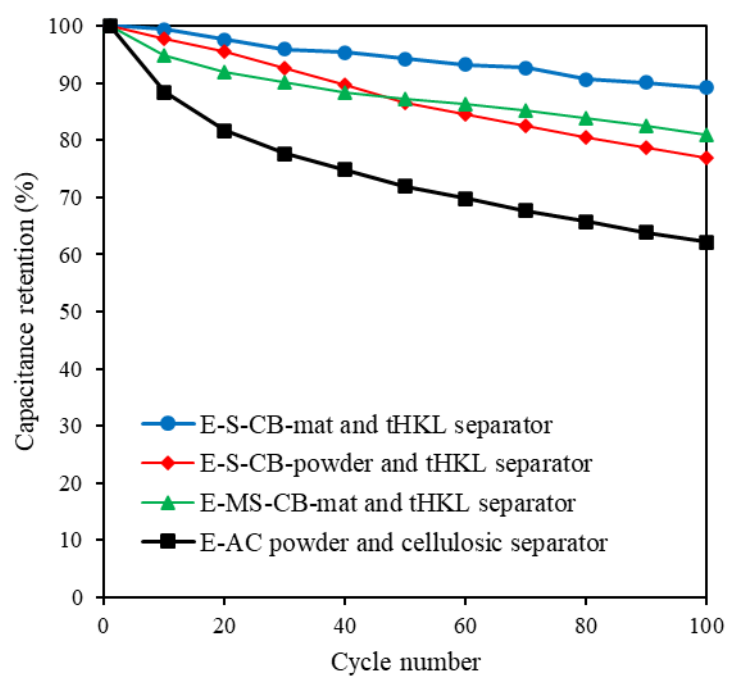

**Supplementary Figure S6:** Cyclic stability of HKL-based EDLCs and a reference EDLC as shown by capacitance retention from GCD at current density of  $1 \text{ A g}^{-1}$ .



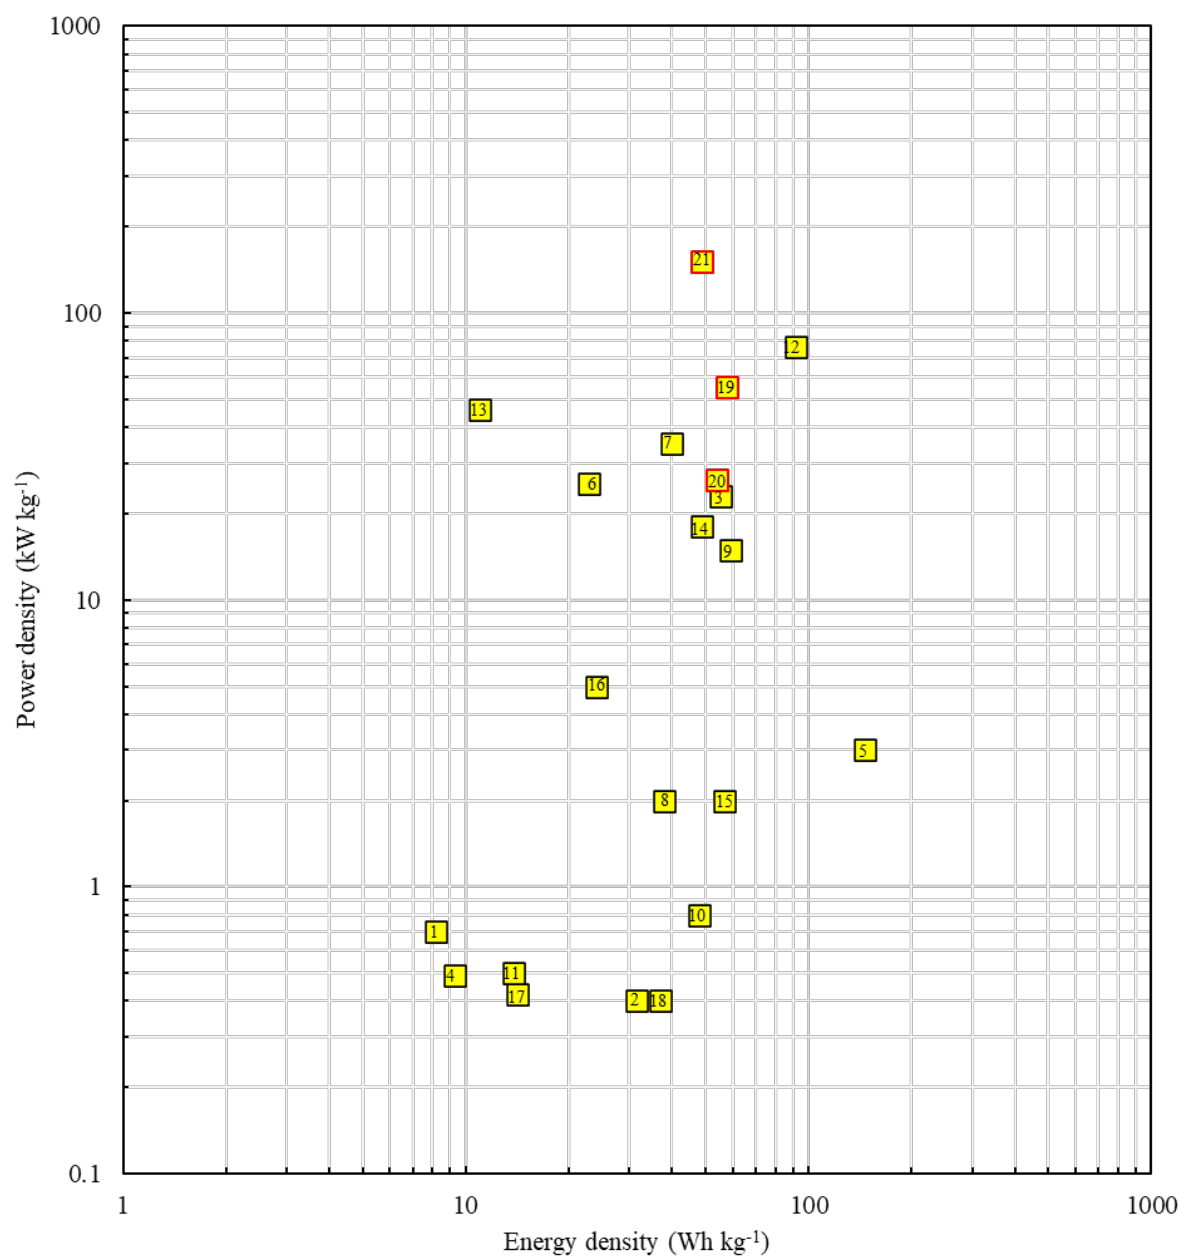

**Supplementary Figure S7:** Comparison of energy and power densities of lignin-based EDLCs.

## References in Figure S7

1. Ajjan, F. N., Vagin, M., Rębiś, T., Aguirre, L. E., Ouyang, L. Q., and Inganäs, O. (2017). Scalable asymmetric supercapacitors based on hybrid organic/biopolymer electrodes. *Adv. Sustain. Syst.* 1: 1700054.
2. Cao, Q. P., Zhu, M. N., Chen, J. A., Song, Y. Y., Li, Y., and Zhou, J. H. (2020). Novel lignin-cellulose-based carbon nanofibers as high-performance supercapacitors. *ACS Appl. Mater. Interfaces* 12: 1210–1221.
3. Chen, W. M., Wang, X., Feizbakhshan, M., Liu, C. Z., Hong, S., Yang, P., and Zhou, X. Y. (2019). Preparation of lignin-based porous carbon with hierarchical oxygen-enriched structure for high-performance supercapacitors. *J. Colloid and Interface Sci.* 540: 524–534.
4. Dai, Z., Ren, P. G., Jin, Y. L., Zhang, H., Ren, F., and Zhang, Q. (2019). Nitrogen-sulphur co-doped graphenes modified electrospun lignin/polyacrylonitrile-based carbon nanofiber as high performance supercapacitor. *J. Power Sources* 437: 226937.
5. Das, S. and Ghosh, A. (2017). Solid Polymer Electrolyte Based on PVDF-HFP and Ionic Liquid Embedded with TiO<sub>2</sub> Nanoparticle for Electric Double Layer Capacitor (EDLC) Application. *J. Electrochem. Soc.* 164: F1348–F1353.
6. Guo, N. N., Li, M., Sun, X. K., Wang, F., and Yang, R. (2017). Enzymatic hydrolysis lignin derived hierarchical porous carbon for supercapacitors in ionic liquids with high power and energy densities. *Green Chem.* 19: 2595–2602.
7. Härmas, R., Palm, R., Härmas, M., Pohl, M., Kurig, H., Tallo, I., Tee, E., Vaas, I., Väli, R., Romann, T., Oll, O., Kanarbik, R., Liivand, K., Eskusson, J., Kruusma, J., Thomberg, T., Jänes, A., Miidla, P., and Lust, E. (2018). Influence of porosity parameters and electrolyte chemical composition on the power densities of non-aqueous and ionic liquid based supercapacitors. *Electrochimica Acta* 283: 931–948.
8. Jayawickramage, R. A. P. and Ferraris, J. P. (2019a). High performance supercapacitors using lignin based electrospun carbon nanofiber electrodes in ionic liquid electrolytes. *Nanotechnology* 30: 155402.
9. Jayawickramage, R. A. P., Balkus, K.J., and Ferraris, J.P. (2019b). Binder free carbon nanofiber electrodes derived from polyacrylonitrile- lignin blends for high performance supercapacitors. *Nanotechnology* 30: 355402.
10. Lei, D. Y., Li, X. D., Seo, M. K., Khil, M. S., Kim, H. Y., and Kim, B. S. (2017). NiCo<sub>2</sub>O<sub>4</sub> nanostructure-decorated PAN/lignin based carbon nanofiber electrodes with excellent cyclability for flexible hybrid supercapacitors. *Polymer* 132: 31–40.
11. Li, F. F., Wang, X. L., and Sun, R. C. (2017). A metal-free and flexible supercapacitor based on redox-active liginosulfonate functionalized graphene hydrogels. *J. Mater. Chem. A* 5: 20643–20650.
12. Pakkang, N., Kumar, M., Taira, S., Koda, K., Shigetomi, K., and Uraki, Y. (2020). Preparation of kraft lignin-based activated carbon fiber electrodes for electric double layer capacitors using an ionic liquid electrolyte. *Holzforschung* 74: 577–588.

13. Senokos, E., Reguero, V., Cabana, L., Palma, J., Marcilla, R., and Vilatela, J. J. (2017). Large-Area, All-Solid, and Flexible Electric Double Layer Capacitors Based on CNT Fiber Electrodes and Polymer Electrolytes. *Adv. Mater. Technol.* 2: 1600290.
14. Shao, Q., Tang, J., Lin, Y., Li, J., Qin, F., Zhang, K., Yuan, J., and Qin, L. C. (2015). Ionic liquid modified graphene for supercapacitors with high rate capability. *Electrochimica Acta* 176: 1441–1446.
15. Wang, J., Tang, J., Xu, Y., Ding, B., Chang, Z., Wang, Y., Hao, X., Dou, H., Kim, J., Zhang, X., and Yamauchi, Y. (2016). Interface miscibility induced double-capillary carbon nanofibers for flexible electric double layer capacitors. *Nano Energy* 28: 232–240.
16. Yadav, N., Yadav, N., and Hashmi, S. (2020). Ionic liquid incorporated, redox-active blend polymer electrolyte for high energy density quasi-solid-state carbon supercapacitor. *J. Power Sources* 451: 227771.
17. You, X. Y., Koda, K., Yamada, T., and Uraki, Y. (2016). Preparation of high-performance internal tandem electric double-layer capacitors (IT-EDLCs) from melt-spun lignin fibers. *J. Wood Chem. Technol.* 36: 418–431.
18. Zhu, M. N., Liu, H., Cao, Q. P., Zheng, H., Xu, D., Guo, H. Y., Wang, S. M., Li, and Y., Zhou, J. H. (2020). Electrospun lignin-based carbon nanofibers as supercapacitor electrodes, *ACS Sustain. Chem. Eng.* 8: 12831–12841.
19. This work (**E-MS-CB-mat**)
20. This work (**E-S-CB-mat**)
21. This work (**E-S-CB-powder**)
